# Supplementary material for: Magnetic properties of two 2D complexes based on 1D chain containing [Fe(bpy)(CN)4]−unit
Source: Royal Society of Chemistry journal article supplement (doi:10.1039/c2dt31757e), 2012-10-04
Supplement: c2dt31757e.pdf [file c2dt31757e.pdf]

## Electronic Supplementary Information

### Magnetic properties of two 2D complexes based on 1D chain containing $[\text{Fe}(\text{bpy})(\text{CN})_4]^-$ unit<sup>†‡</sup>

Xiao-Jiao Song, Mohd. Muddassir, Ying Chen, Hui-Sheng Wang, You Song\* and Xiao-Zeng You

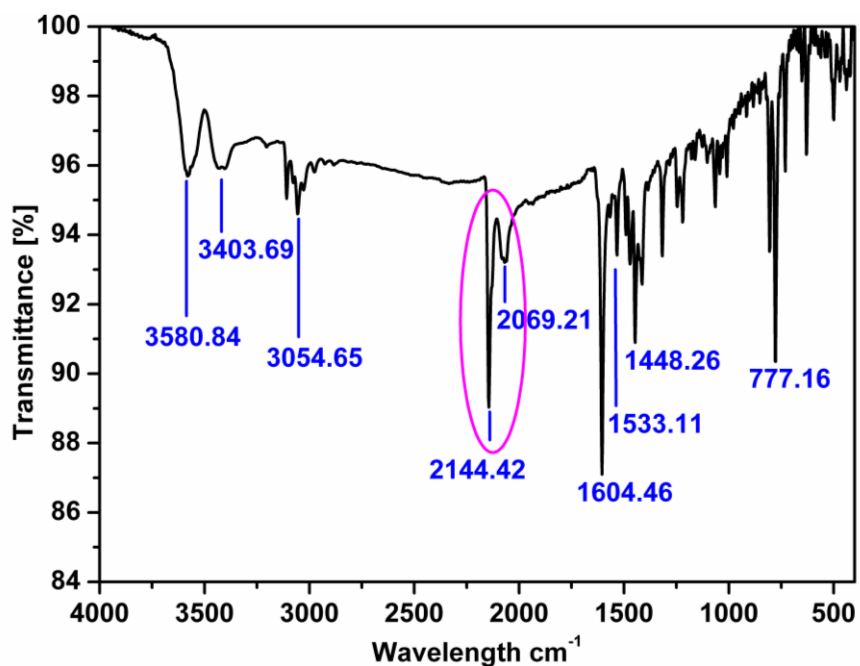

Fig. S1 IR spectra of complex 1.

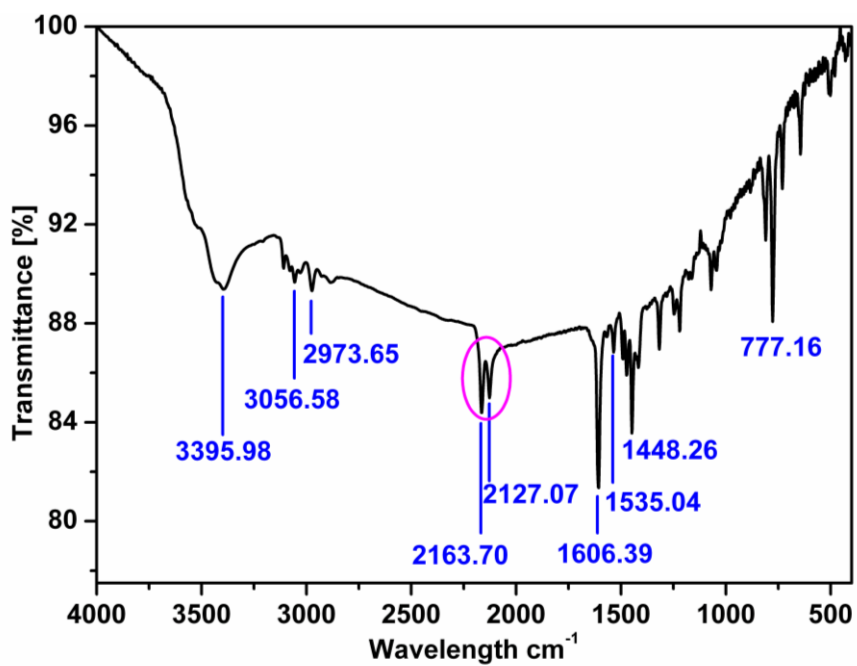

Fig. S2 IR spectra of complex 2.

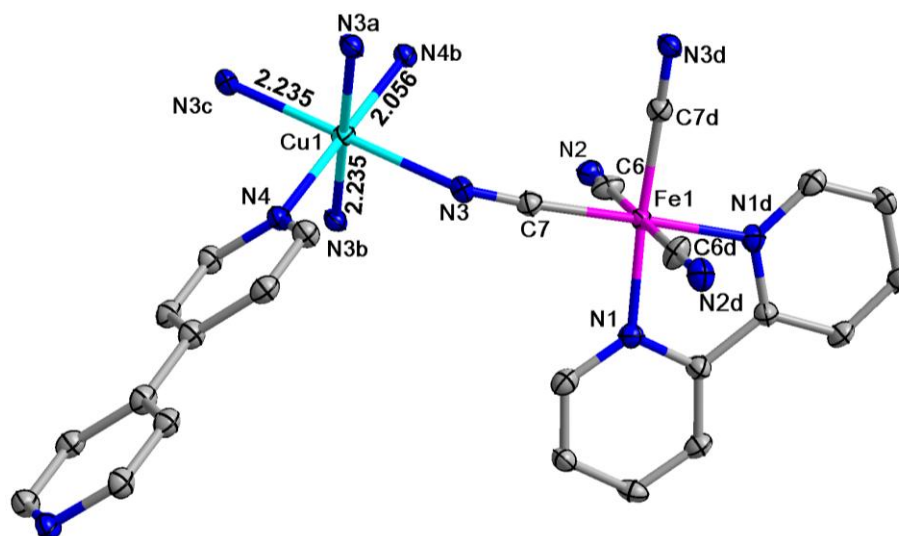

**Fig. S3** The drawing of the coordination environment ellipse for complex **2**. H atoms and H<sub>2</sub>O molecules are omitted for clarity. Symmetry code: (a)  $-1+x, y, z$ ; (b)  $2-x, 2-y, 1-z$ ; (c)  $2-x, 2-y, 2-z$ .

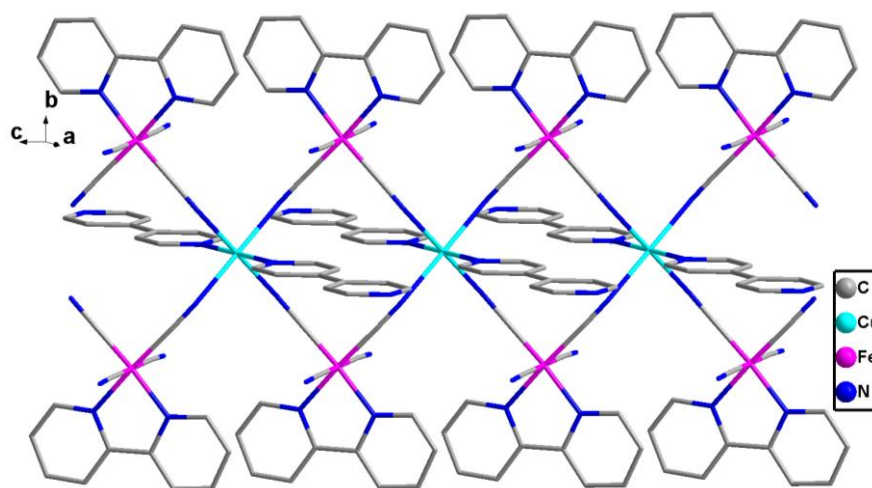

**Fig. S4** Side view of the 1D 2,4-ribbon double zigzag chain for complex **2**. H atoms and H<sub>2</sub>O molecules are omitted for clarity.

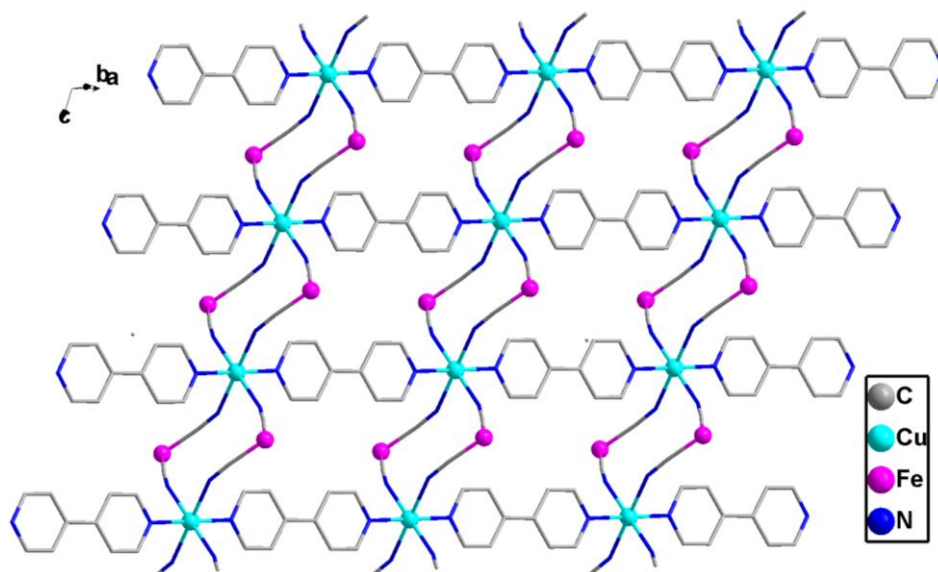

**Fig. S5** Side view of 2D layer for **2**. Atoms not involved in bridging are omitted for clarity.

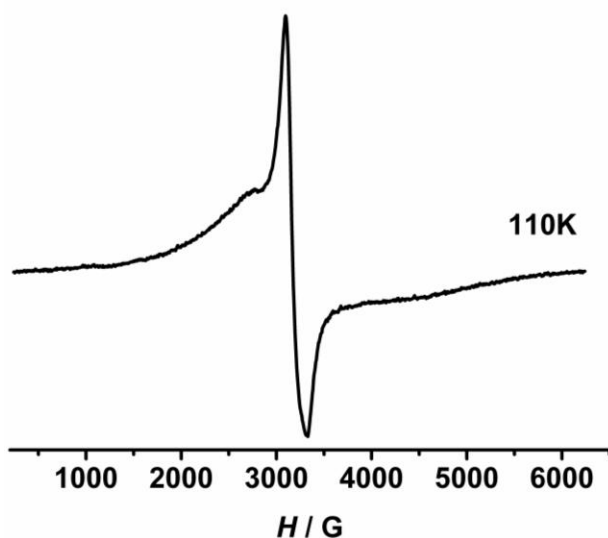

**Figure S6** The X-band EPR spectra of **2** at 110K. Parameters:  $g_{\parallel} = 2.07\text{--}2.08$ ,  $g_{\perp} = 2.14$ .

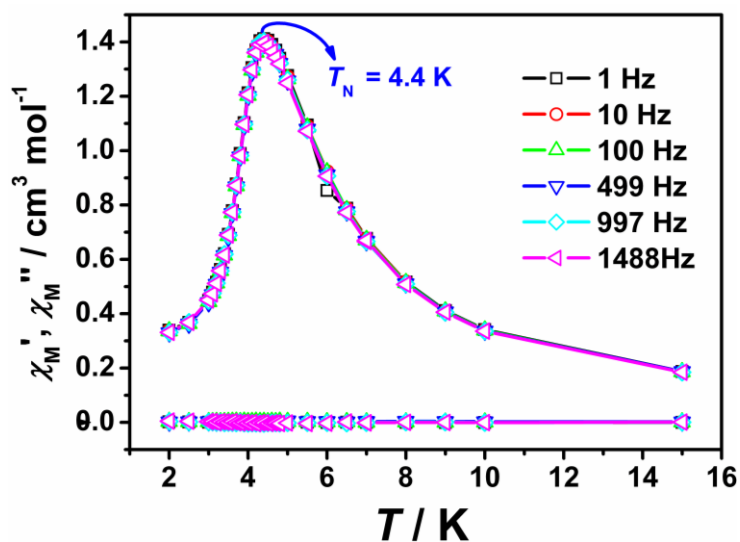

**Fig. S7** Real ( $\chi_M'$ ) and imaginary ( $\chi_M''$ ) ac susceptibilities in 50e applied ac field at different frequencies for **1**.

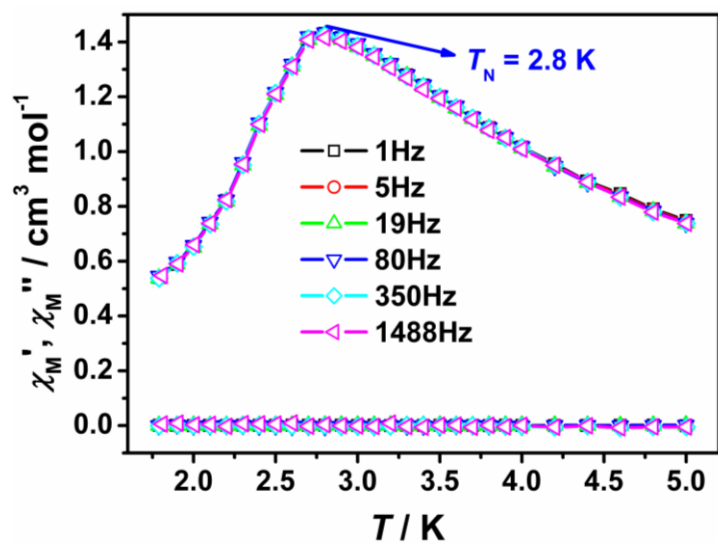

**Fig. S8**  $\chi_M'$  and  $\chi_M''$  ac susceptibilities in  $H_{dc} = 0$  and an  $H_{ac} = 50\text{e}$  at different frequencies for **2**.

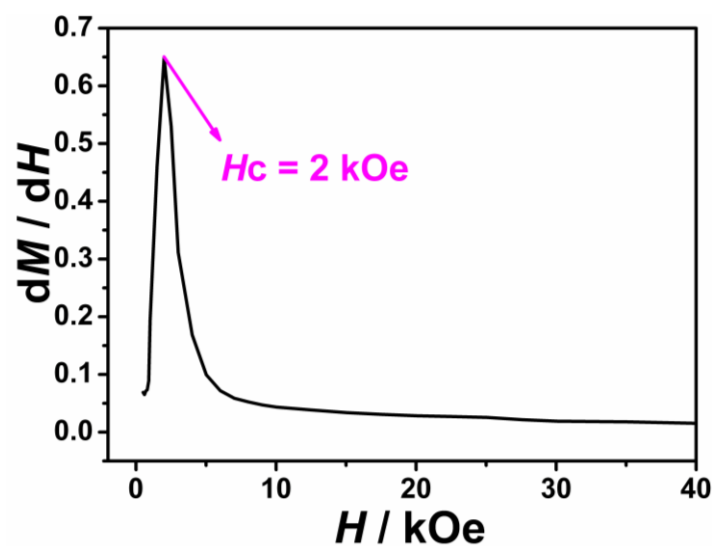

Fig. S9 The plot of  $dM/dH$  vs  $H$  for complex 1.

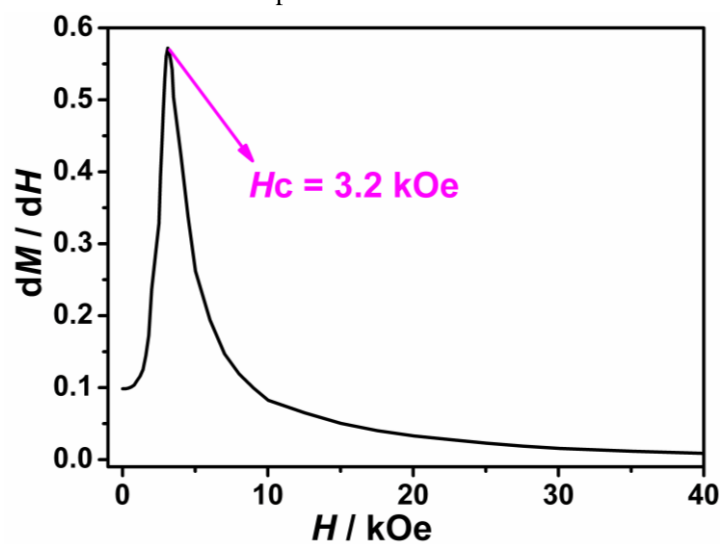

Fig. S10 The plot of  $dM/dH$  vs  $H$  for complex 2.

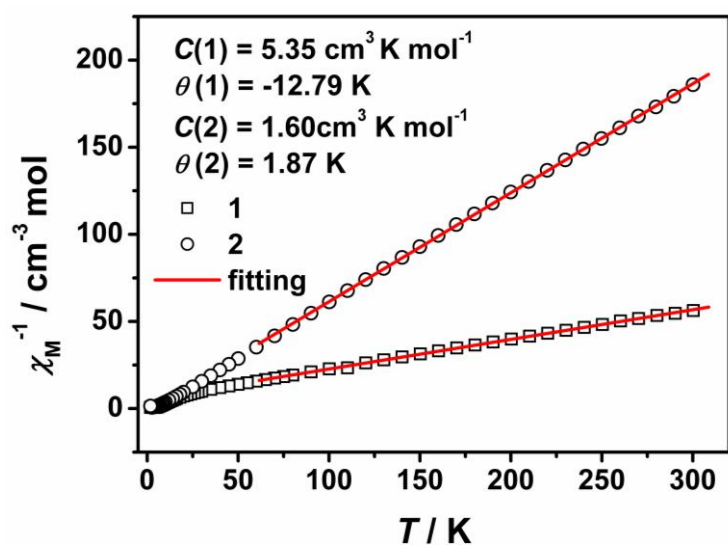

Fig. S11  $\chi_M^{-1}$  vs  $T$  in an applied field of 2 kOe for **1** (square) and **2** (circle). The red solid lines correspond to the best fit to the Curie-Weiss law.
